# Supplementary material for: Synthesis and characterization of [(HPO3)6Mo21O60(H2O)4]8−: a new redox active heteropoly blue cluster with layered shape containing a phosphite template that self-assembles under controlled microwave irradiation
Source: Royal Society of Chemistry journal article supplement (doi:10.1039/c5dt04977f), 2016-01-01
Supplement: c5dt04977f1.pdf [file c5dt04977f1.pdf]

## Supporting Information

### **Synthesis and characterization of the $[(\text{HPO}_3)_6\text{Mo}_{21}\text{O}_{60}(\text{H}_2\text{O})_4]^{8-}$ : A new redox active heteropoly blue cluster with layered shape containing phosphite template that self-assembly under controlled microwave irradiation**

Xiang-xiao Jin, Wei-dong Yu, Yan-Mei Nie, Meng-Shu Liu and Jun Yan\*†

†School of Chemistry and Chemical Engineering, Central South University, Changsha 410083, P.R. China

Fax: + 86 (0)731 8887 9616; Tel: + 86 (0)731 8887 9616; E-mail: yanjun@csu.edu.cn

#### **Table of Contents**

1. Chemicals and instruments
2. Synthesis
3. Crystallographic data
4.  $^{31}\text{P}$ -NMR
5. Mass Spectrometry data
6. CV and DPV
7. UV-vis spectra
8. Infrared spectra
9. TGA and DSC

#### **1. Chemicals and instruments**

All chemicals were purchased from commercial sources and used without further purification. The reaction was carried out in a NOVA-2S microwave reactor. The IR spectra were obtained on an Alpha Centauri FTIR spectrometer in the 400-4000  $\text{cm}^{-1}$  region with a KBr pellet. The TG-DSC were performed on a PerkinElmer TGA7 instrument under flowing argon with a heating rate of 10  $\text{K}\cdot\text{min}^{-1}$  at 35–800  $^{\circ}\text{C}$ . The UV spectra were obtained on a SHIMADZU UV-VIS spectrophotometer. The CV spectra were performed on a CHI600E electrochemical workstation. The  $^{31}\text{P}$  NMR spectra were performed on Bruker DRX500MHz Nuclear Magnetic Resonance. ESI-MS (electrospray ionization mass spectrometry): Measurements were performed using a Waters Synapt-G2 spectrometer. The instrument was operated in negative mode and with an electrospray source from Waters Q-ToF Qualification Standard Kit. Data analysis was performed on the Waters MassLynx v4.1 software. CHN analyses were determined using an 5E-CHN2000 Elemental Analyser.

## 2. Synthesis

Synthesis of  $(C_2H_8N)_8[(HPO_3)_6Mo_{21}O_{64}H_8] \cdot 16H_2O$  (**1**).  $Na_2MoO_4 \cdot 2H_2O$  (0.5 g, 2.07 mmol) and  $(CH_3)_2NH \cdot HCl$  (1.0g, 12.26mmol) were dissolved in 15 mL of distilled water with moderate stirring.  $N_2H_4 \cdot H_2SO_4$  (0.049 g, 0.414 mmol) was added to the mixture sequentially till resulting in a pale-blue solution, followed by adjustment of the pH to 4.4 with 1 M HCl. Then  $H_3PO_3$  (0.0845g, 1.035mmol) was added in. The mixture was placed in a microwave reactor (NOVA-2S, PreeKem) and irradiated inside the cavity of labstation. The temperature was up to 35 °C after 10 min as set and 10 mL methyl alcohol were added in after 8 min. (The reaction parameters are: atmospheric model; heat-up time: 10min; holding time: 10min;) After 2min, the mixture was filtered and dark blue claviform crystals formed over a 2-day period. Yield: 0.775g, 15.5% (based on Mo)

Synthesis of  $(C_2H_8N)_4[PMo_{12}O_{40}] \cdot 2C_2H_7N$  (**2**).  $Na_2MoO_4 \cdot 2H_2O$  (0.5 g, 2.07 mmol) and  $(CH_3)_2NH \cdot HCl$  (1.0g, 12.26mmol) were dissolved in 15 mL of distilled water with moderate stirring.  $N_2H_4 \cdot H_2SO_4$  (0.0245 g, 0.207 mmol) was added to the mixture sequentially till resulting in a pale-blue solution, followed by adjustment of the pH to 4.64 with 10% (wt%)  $H_3PO_3$ . The mixture was stirred at room temperature for 1h and 10 mL methyl alcohol was added. After 20min, the mixture was filtered and dark blue cubic crystals formed over a 20-day period. Yield: 0.105g, 28.3% (based on Mo)

## 3. Crystallographic data

**Table S1:** Crystallographic Details for Compound **1** and **2**

| Compound              | <b>1</b>                           | <b>2</b>                        |
|-----------------------|------------------------------------|---------------------------------|
| Empirical formula     | $C_{16}H_{110}Mo_{21}N_8O_{98}P_6$ | $C_{12}H_{46}Mo_{12}N_6O_{40}P$ |
| CCDC number           | 1436128                            | 1436253                         |
| Formula weight        | 4183.68                            | 2096.80                         |
| Temperature (K)       | 296(2)                             | 296(2)                          |
| Crystal system        | Triclinic                          | Orthorhombic                    |
| Space group           | P-1                                | Pnma                            |
| $a$ (Å)               | 13.5799(6)                         | 22.5266(5)                      |
| $b$ (Å)               | 20.0897(9)                         | 19.5714(4)                      |
| $c$ (Å)               | 23.0045(10)                        | 11.2097(2)                      |
| $\alpha$ (°)          | 99.020(3)                          | 90.00                           |
| $\beta$ (°)           | 90.469(3)                          | 90.00                           |
| $\gamma$ (°)          | 107.358(2)                         | 90.00                           |
| $V$ (Å <sup>3</sup> ) | 5906.0(5)                          | 4942.10(17)                     |
| $Z$                   | 2                                  | 4                               |
| Calculated density    | 2.353                              | 2.818                           |

|                                |               |             |
|--------------------------------|---------------|-------------|
| (Mg m <sup>-3</sup> )          |               |             |
| $\mu$ (mm <sup>-1</sup> )      | 2.338         | 3.075       |
| $\theta$ (°)                   | 25.64         | 25.99       |
| F (000)                        | 4036          | 3996        |
| Reflections collected          | 84891         | 68965       |
| Independent reflections        | 11206         | 4093        |
| $R_{\text{int}}$               | 0.0825        | 0.0352      |
| Data / restraints / parameters | 22830/35/1080 | 4998/17/296 |
| Goodness-of-fit on $\rho^2$    | 0.966         | 1.205       |
| Final $R$ indices              | 0.0733        | 0.0554      |
| [ $I > 2\sigma(I)$ ]           | 0.1784        | 0.1300      |
| $R$ indices (all data)         | 0.1592        | 0.0725      |
|                                | 0.2034        | 0.1485      |

**Table S2** the BVS calculation result of the cluster 1a.

| Code | Bond Valence | Code | Bond Valence | Protonation Degree |
|------|--------------|------|--------------|--------------------|
| Mo1  | 5.867        | P1   | 3.862        | 1                  |
| Mo2  | 5.888        | P2   | 3.903        | 1                  |
| Mo3  | 5.849        | P3   | 4.006        | 1                  |
| Mo4  | 5.751        | P4   | 3.919        | 1                  |
| Mo5  | 5.766        | P5   | 3.876        | 1                  |
| Mo6  | 5.898        | P6   | 3.996        | 1                  |
| Mo7  | 5.589        | O65  | 0.164        | 2                  |
| Mo8  | 5.667        | O64  | 0.227        | 2                  |
| Mo9  | 5.814        | O49  | 0.266        | 2                  |
| Mo10 | 5.782        | O46  | 0.218        | 2                  |
| Mo11 | 5.787        | Mo16 | 6.119        |                    |
| Mo12 | 5.801        | Mo17 | 6.084        |                    |
| Mo13 | 6.069        | Mo18 | 6.120        |                    |
| Mo14 | 5.691        | Mo19 | 6.104        |                    |
| Mo15 | 6.156        | Mo20 | 5.932        |                    |
|      |              | Mo21 | 6.034        |                    |

#### 4. $^{31}\text{P}$ -NMR

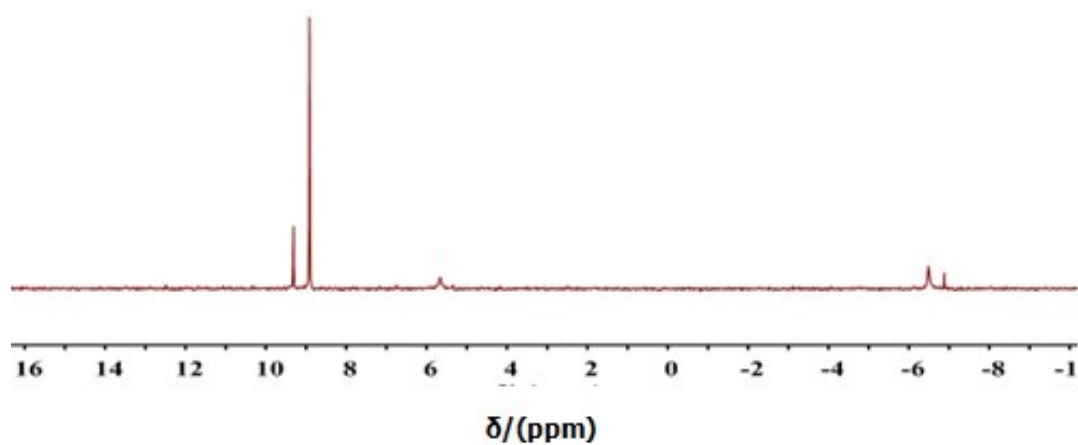

**Fig. S1:** proton decoupled  $^{31}\text{P}$ -NMR of compound 1 in  $\text{CD}_3\text{CN}$

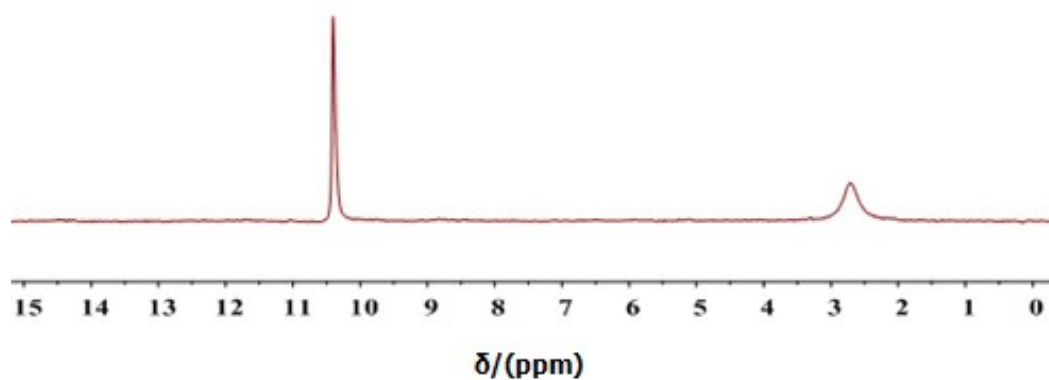

**Fig. S2:** proton decoupled  $^{31}\text{P}$ -NMR of compound 1 in  $\text{D}_2\text{O}$

#### 5. ESI- MS Mass Spectrometry data

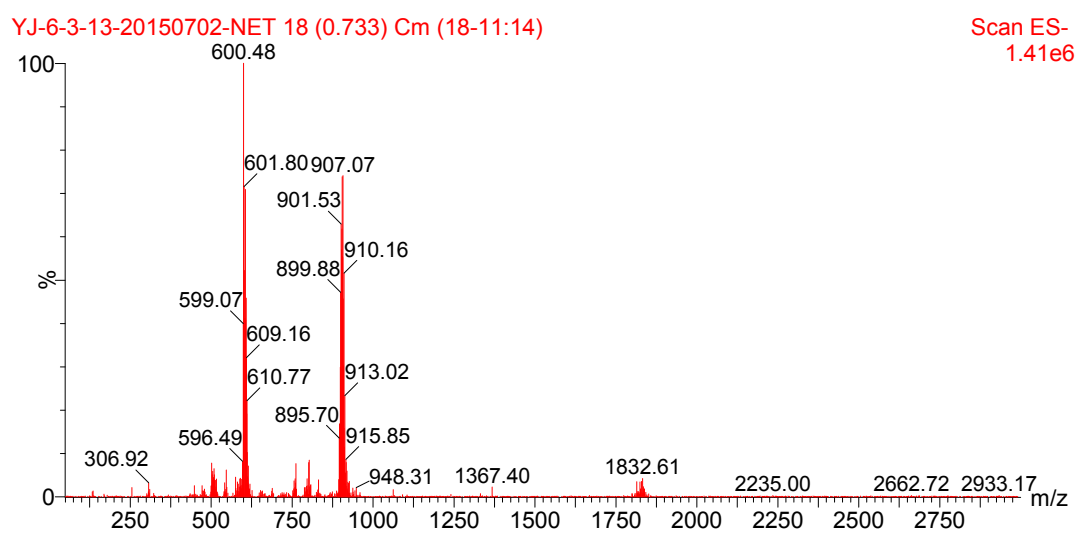

**Fig. S3** the negative ESI-MS spectrum of Compound 1 dissolved in  $\text{CH}_3\text{CN}$

**Table S3.** Assignments of the major peaks for the ESI-MS analysis of Compound 1.

| m/z (Obs) | z Assignment                                                                                                         | m/z (Calc) |
|-----------|----------------------------------------------------------------------------------------------------------------------|------------|
| 600.48    | $(\text{C}_2\text{H}_8\text{N})_2[(\text{HPO}_3)_6\text{Mo}_{21}\text{O}_{60}(\text{H}_2\text{O})_3]^{6-}$           | 600.11     |
| 907.07    | $(\text{C}_2\text{H}_8\text{N})_2\text{H}_2[(\text{HPO}_3)_6\text{Mo}_{21}\text{O}_{60}(\text{H}_2\text{O})_4]^{4-}$ | 905.17     |
| 1832.61   | $(\text{C}_2\text{H}_8\text{N})_3\text{H}[(\text{HPO}_3)_6\text{Mo}_{21}\text{O}_{60}(\text{H}_2\text{O})_4]^{3-}$   | 1832.81    |

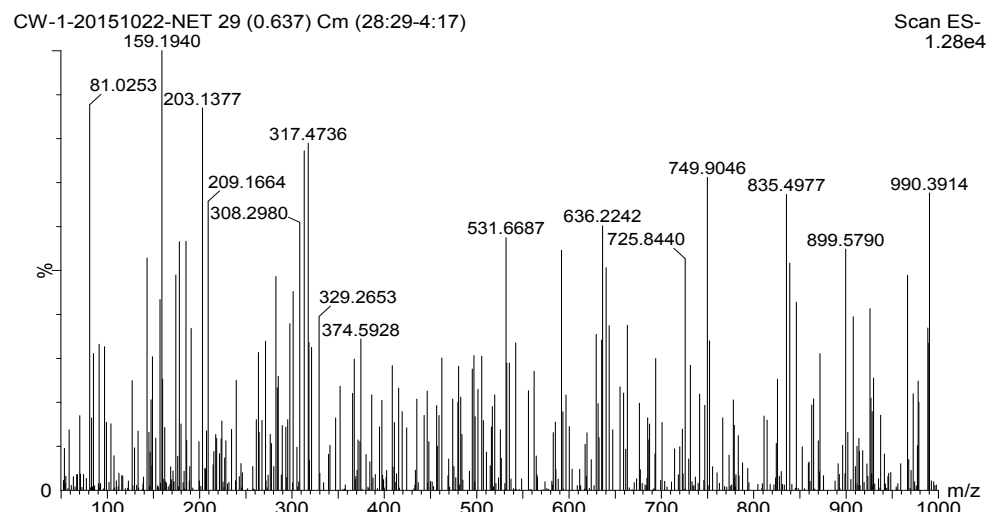**Fig. S4** the negative ESI-MS spectrum of Compound 1 dissolved in  $\text{H}_2\text{O}$ 

## 6. Cyclic voltammograms and Differential pulse voltammetry data

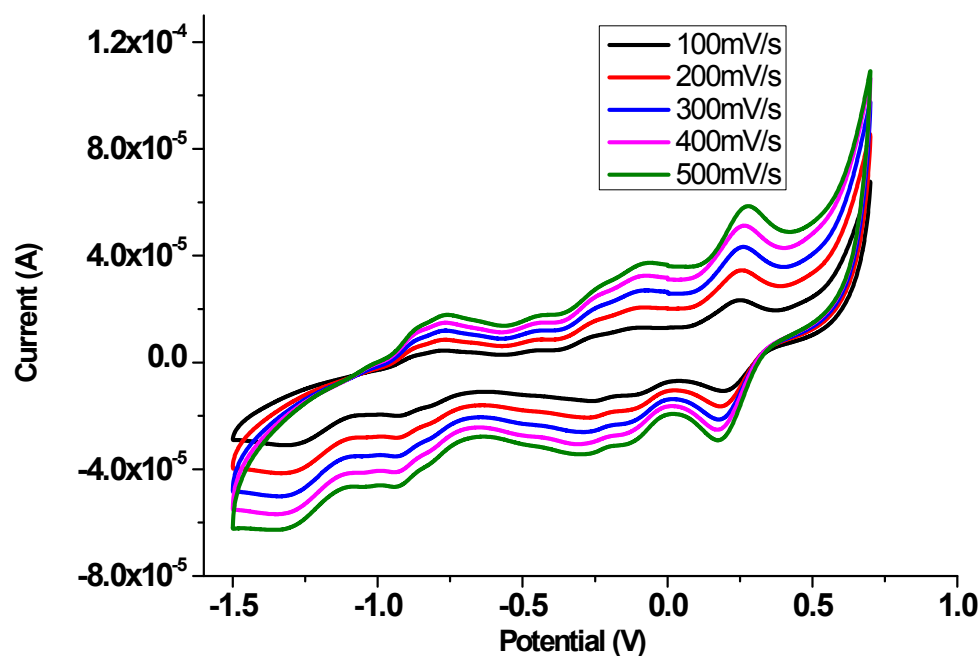**Fig S5** Cyclic voltammograms of  $2.5 \times 10^{-5}$  M solution of **1** in  $\text{CH}_3\text{CN}$  with different scan rates. The working electrode was glassy carbon, the counter electrode was Pt wire, and the reference electrode was Ag/AgCl

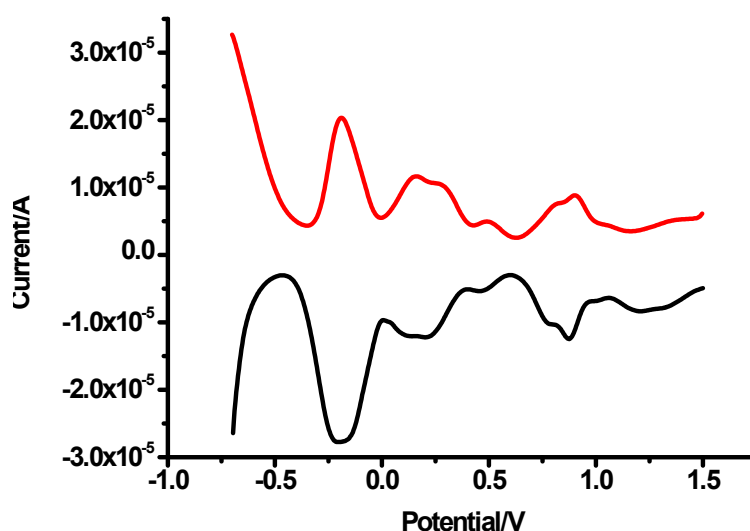

**Fig. S6.** Differential pulse voltammetry of  $2.5 \times 10^{-5}$  M solution of **1** in  $\text{CH}_3\text{CN}$ .

**Table S4:** DPV data for Compound **1**

| From negative to positive electrode    | From positive to negative electrode    |
|----------------------------------------|----------------------------------------|
| Init E (V) = -0.7                      | Init E (V) = 1.5                       |
| Final E (V) = 1.5                      | Final E (V) = -0.7                     |
| Incr E (V) = 0.004                     | Incr E (V) = 0.004                     |
| Amplitude (V) = 0.05                   | Amplitude (V) = 0.05                   |
| Pulse Width (sec) = 0.05               | Pulse Width (sec) = 0.05               |
| Sample Width (sec) = 0.0167            | Sample Width (sec) = 0.0167            |
| Pulse Period (sec) = 0.5               | Pulse Period (sec) = 0.5               |
| Quiet Time (sec) = 2                   | Quiet Time (sec) = 2                   |
| Sensitivity (A/V) = $1 \times 10^{-4}$ | Sensitivity (A/V) = $1 \times 10^{-4}$ |
| Ep = -0.200V                           | Ep = 0.900V                            |
| ip = $-2.106 \times 10^{-5}$ A         | ip = $1.975 \times 10^{-6}$ A          |
| Ap = $-4.885 \times 10^{-6}$ VA        | Ap = $1.450 \times 10^{-7}$ VA         |
| Ep = 0.456V                            | Ep = 0.492V                            |
| ip = $-9.110 \times 10^{-7}$ A         | ip = $1.179 \times 10^{-6}$ A          |
| Ap = $-9.613 \times 10^{-8}$ VA        | Ap = $1.127 \times 10^{-7}$ VA         |
| Ep = 0.876V                            | Ep = 0.160V                            |
| ip = $-3.366 \times 10^{-6}$ A         | ip = $2.746 \times 10^{-6}$ A          |
| Ap = $-2.383 \times 10^{-7}$ VA        | Ap = $3.357 \times 10^{-7}$ VA         |
|                                        | Ep = -0.188V                           |
|                                        | ip = $1.544 \times 10^{-5}$ A          |
|                                        | Ap = $2.375 \times 10^{-6}$ VA         |

## 7. UV- visible spectrum

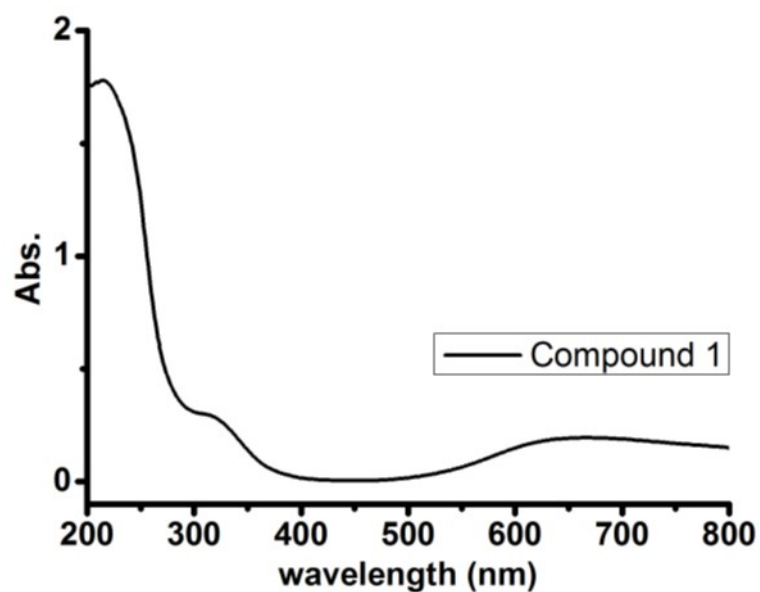

**Fig. S7.** UV- visible spectrum ranging from 210 nm to 800 nm of  $2.18 \times 10^{-6}$  M solution of **1** in  $\text{CH}_3\text{CN}$  .

## 8. Infrared spectra

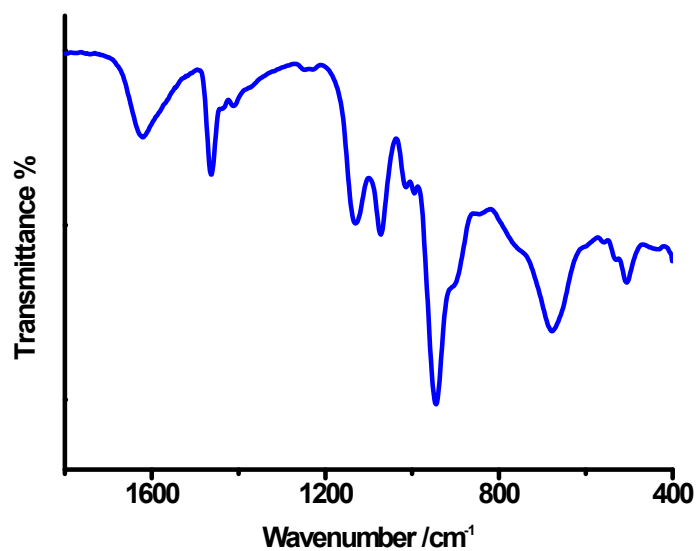

**Fig S8.** Infrared spectra ranging from 400  $\text{cm}^{-1}$  to 1800  $\text{cm}^{-1}$  of compound **1**

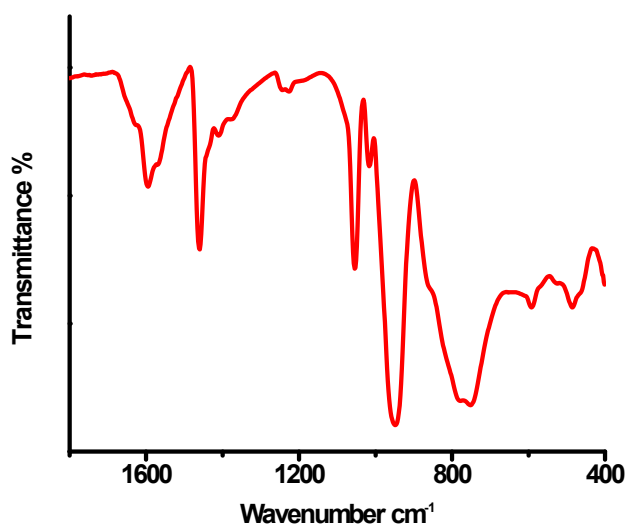

**Fig S9.** Infrared spectra ranging from 400  $\text{cm}^{-1}$  to 1800  $\text{cm}^{-1}$  of compound 2

## 9. TGA and DSC

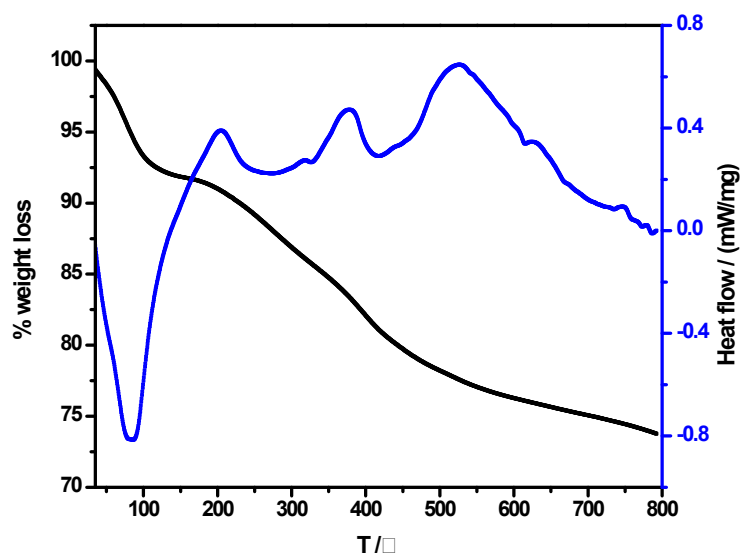

**Fig. S10.** TGA and DSC analysis of compound 1.

The TG curve shows three consecutive weight loss stages in the entire temperature range. The simultaneous TG-DSC data for compound 1 evolved that, in the range of 35–100  $^{\circ}\text{C}$ , a mass of weight (7.6%) was desorbed corresponding to the release of the solvent water about 16  $\text{H}_2\text{O}$  per cluster at around 90 $^{\circ}\text{C}$ .
